# Supplementary material
Source: PubMed Central journal article supplement (PMC7398589)
Supplement: NIHMS1606581-supplement-Supplemental_Material.pdf [file NIHMS1606581-supplement-Supplemental_Material.pdf]

## **SUPPLEMENTAL MATERIAL: VIDEO LEGENDS**

**Videos 1-7. Initial transthoracic echocardiogram (TTE). 1: parasternal long-axis. 2: 4-chamber. 3: 3-chamber. 4: 2-chamber. 5: Short-axis (SHAX) of base. 6: SHAX of mid-ventricle. 7: SHAX of apex.**

TTE demonstrated mid-wall hypokinesis of the left ventricular (LV) with normal contractility of the basal and apical segments, and normal right ventricular systolic function.

**Videos 8-12. Follow up TTE during clinical improvement. 8: parasternal long-axis. 9: 4-chamber. 10: SHAX of base. 11: SHAX of mid-ventricle. 12: SHAX of apex.**

Repeat TTE 10 days later from initial TTE demonstrates recovery of LV systolic function with resolution of regional dysfunction. Of note, 3-chamber and 2-chamber image acquisitions were suboptimal.
